# Supplementary material for: The density-based many-body expansion for poly-peptides and proteins
Source: Royal Society of Chemistry journal article supplement (doi:10.1039/d5cp00727e), 2025-01-01
Supplement: d5cp00727e1.pdf [file d5cp00727e1.pdf]

# The density-based many-body expansion for polypeptides and proteins

Johannes R. Vornweg<sup>1</sup>, Toni M. Maier<sup>2</sup>, Christoph R. Jacob<sup>3</sup>

Technische Universität Braunschweig, Institute of Physical and Theoretical Chemistry,  
Gaußstraße 17, 38106 Braunschweig, Germany

## Supporting Information

Date: April 1, 2025

---

<sup>1</sup>ORCID: 0000-0002-1457-0173

<sup>2</sup>ORCID: 0000-0001-5571-7576

<sup>3</sup>ORCID: 0000-0002-6227-8476; E-Mail: c.jacob@tu-braunschweig.de

# S1 Explicit equations for density-based correction

## S1.1 db-MBE

For arbitrary orders, the density-based energy correction  $\Delta E_{\text{db-eb}}^{(n)}$  appearing in Eq. (10) is given by [cf. Eq. (11)],

$$\begin{aligned} \Delta E_{\text{db-eb}}^{(n)} & \left[ \{\rho_{i_1}, \rho_{i_1 i_2}, \dots\} \right] \\ & = \left( V_{\text{nuc}}[\rho_{\text{tot}}^{(n)}] - V_{\text{nuc}}^{(n)} \right) + \left( J[\rho_{\text{tot}}^{(n)}] - J^{(n)} \right) + \left( E_{\text{NN}} - E_{\text{NN}}^{(n)} \right) \\ & \quad + T_{\text{s}}^{\text{nadd},(n)}[\rho_{i_1}, \rho_{i_1 i_2}, \dots] + E_{\text{xc}}^{\text{nadd},(n)}[\rho_{i_1}, \rho_{i_1 i_2}, \dots], \end{aligned} \quad (\text{S1})$$

with the  $n$ -body nonadditive kinetic and exchange-correlation energy functionals defined as

$$T_{\text{s}}^{\text{nadd},(n)}[\{\rho_{i_1}, \rho_{i_1 i_2}, \dots\}] = T_{\text{s}}[\rho_{\text{tot}}^{(n)}] - T_{\text{s}}^{(n)} \quad (\text{S2})$$

$$E_{\text{xc}}^{\text{nadd},(n)}[\{\rho_{i_1}, \rho_{i_1 i_2}, \dots\}] = E_{\text{xc}}[\rho_{\text{tot}}^{(n)}] - E_{\text{xc}}^{(n)}. \quad (\text{S3})$$

Here,  $V_{\text{nuc}}^{(n)}$ ,  $J^{(n)}$ ,  $E_{\text{NN}}^{(n)}$ ,  $T_{\text{s}}^{(n)}$ , and  $E_{\text{xc}}^{(n)}$  are the MBEs of the individual contributions to the KS-DFT total energy functional, which are defined in analogy to Eq. (1), i.e.,

$$X^{(n)} = X^{(1)} + \sum_{m=2}^n \Delta X^{(m)}, \quad (\text{S4})$$

with

$$\Delta X^{(n)} = \sum_{i_1=1}^N \sum_{i_2=i_1+1}^N \dots \sum_{i_n=i_{n-1}+1}^N X_{i_1 i_2 \dots i_n} - \sum_{m=1}^{n-1} \frac{N^{n-m}}{(n-m)!} \cdot \Delta X^{(m)}, \quad (\text{S5})$$

Note that a correction due to the nuclear repulsion energy only appears at first order, because  $E_{\text{NN}}^{(n)} = E_{\text{NN}}$  for  $n \geq 2$ .

At first order, the density-based correction is given by

$$\begin{aligned}
\Delta E_{\text{db-eb}}^{(1)} \left[ \{\rho_{i_1}\}_{i_1=1,\dots,N} \right] &= \sum_{i_1=1}^N \sum_{j_1=i_1+1}^N E_{\text{NN}}^{(i_1 j_1)} + \sum_{i_1=1}^N \sum_{\substack{j_1=1 \\ j_1 \neq i_1}}^N \int \rho_{i_1}(\mathbf{r}) v_{\text{nuc}}^{(j_1)}(\mathbf{r}) d^3r \\
&+ \sum_{i_1=1}^N \sum_{j_1=i_1+1}^N \iint \frac{\rho_{i_1}(\mathbf{r}) \rho_{j_1}(\mathbf{r}')}{|\mathbf{r} - \mathbf{r}'|} d^3r d^3r' \\
&+ E_{\text{xc}}^{\text{nadd}} [\{\rho_{i_1}\}_{i_1=1,\dots,N}] + T_s^{\text{nadd}} [\{\rho_{i_1}\}_{i_1=1,\dots,N}], \tag{S6}
\end{aligned}$$

which is the interaction energy expression also appearing in subsystem DFT [1].

At second order, the density-based correction is given by

$$\begin{aligned}
\Delta E_{\text{db-eb}}^{(2)} \left[ \{\rho_{i_1}\}_{i_1=1,\dots,N}, \{\rho_{i_1 i_2}\}_{i_1=1,\dots,N; i_2=i_1,\dots,N} \right] &= \left( V_{\text{nuc}}[\rho_{\text{tot}}^{(2)}] - V_{\text{nuc}}^{(2)} \right) + \left( J[\rho_{\text{tot}}^{(2)}] - J^{(2)} \right) \\
&+ E_{\text{xc}}^{\text{nadd},(2)} \left[ \{\rho_{i_1}\}_{i_1=1,\dots,N}, \{\rho_{i_1 i_2}\}_{i_1=1,\dots,N; i_2=i_1,\dots,N} \right] \\
&+ T_s^{\text{nadd},(2)} \left[ \{\rho_{i_1}\}_{i_1=1,\dots,N}, \{\rho_{i_1 i_2}\}_{i_1=1,\dots,N; i_2=i_1,\dots,N} \right]. \tag{S7}
\end{aligned}$$

Here, the electron–nuclei interaction contribution is calculated as

$$\begin{aligned}
V_{\text{nuc}}[\rho_{\text{tot}}^{(2)}] - V_{\text{nuc}}^{(2)} &= \int \rho_{\text{tot}}^{(1)}(\mathbf{r}) v_{\text{nuc}}^{\text{tot}}(\mathbf{r}) d^3r + \int \Delta \rho_{\text{tot}}^{(2)}(\mathbf{r}) v_{\text{nuc}}^{\text{tot}}(\mathbf{r}) d^3r \\
&- \left( \sum_{i_1=1}^N \int \rho_{i_1}(\mathbf{r}) v_{\text{nuc}}^{(i_1)}(\mathbf{r}) d^3r \right. \\
&\quad + \sum_{i_1=1}^N \sum_{i_2=i_1+1}^N \left[ \int \rho_{i_1 i_2}(\mathbf{r}) v_{\text{nuc}}^{(i_1 i_2)}(\mathbf{r}) d^3r \right. \\
&\quad \left. \left. - \int \rho_{i_1}(\mathbf{r}) v_{\text{nuc}}^{(i_1)}(\mathbf{r}) d^3r - \int \rho_{i_2}(\mathbf{r}) v_{\text{nuc}}^{(i_2)}(\mathbf{r}) d^3r \right] \right) \tag{S8}
\end{aligned}$$

and the Coulomb interaction is calculated as

$$\begin{aligned}
J[\rho_{\text{tot}}^{(2)}] - J^{(2)} = & \frac{1}{2} \iint \frac{\rho_{\text{tot}}^{(1)}(\mathbf{r}) \rho_{\text{tot}}^{(1)}(\mathbf{r}')}{|\mathbf{r} - \mathbf{r}'|} d^3r d^3r' \\
& + \iint \frac{\rho_{\text{tot}}^{(1)}(\mathbf{r}) \Delta \rho_{\text{tot}}^{(2)}(\mathbf{r}')}{|\mathbf{r} - \mathbf{r}'|} d^3r d^3r' + \frac{1}{2} \iint \frac{\Delta \rho_{\text{tot}}^{(2)}(\mathbf{r}) \Delta \rho_{\text{tot}}^{(2)}(\mathbf{r}')}{|\mathbf{r} - \mathbf{r}'|} d^3r d^3r'. \\
& - \left( \sum_{i_1=1}^N \frac{1}{2} \iint \frac{\rho_{i_1}(\mathbf{r}) \rho_{i_1}(\mathbf{r}')}{|\mathbf{r} - \mathbf{r}'|} d^3r d^3r' \right. \\
& \quad + \sum_{i_1=1}^N \sum_{i_2=i_1+1}^N \left[ \frac{1}{2} \iint \frac{\rho_{i_1 i_2}(\mathbf{r}) \rho_{i_1 i_2}(\mathbf{r}')}{|\mathbf{r} - \mathbf{r}'|} d^3r d^3r' \right. \\
& \quad \quad - \frac{1}{2} \iint \frac{\rho_{i_1}(\mathbf{r}) \rho_{i_1}(\mathbf{r}')}{|\mathbf{r} - \mathbf{r}'|} d^3r d^3r' \\
& \quad \quad \left. - \frac{1}{2} \iint \frac{\rho_{i_2}(\mathbf{r}) \rho_{i_2}(\mathbf{r}')}{|\mathbf{r} - \mathbf{r}'|} d^3r d^3r' \right] \Bigg) \quad (\text{S9})
\end{aligned}$$

and the second-order nonadditive kinetic and exchange–correlation functionals are given by

$$\begin{aligned}
& X^{\text{nadd},(2)} \left[ \{ \rho_{i_1} \}_{i=1,\dots,N}, \{ \rho_{i_1 i_2} \}_{i_1=1,\dots,N; i_2=i_1,\dots,N} \right] \\
& = X[\rho_{\text{tot}}^{(2)}] - \left( \sum_{i_1=1}^N \sum_{i_2=i_1+1}^N X[\rho_{i_1 i_2}] - (N-1) \sum_{i_1=1}^N X[\rho_{i_1}] \right). \quad (\text{S10})
\end{aligned}$$

## S1.2 db-MFCC

For db-MFCC and eb-MFCC-MBE(2), the density-based correction can be evaluated using Eq. (S1), where for the many-body expansions of the individual energy terms, the more general definition including the contributions of the cap is used.

At first order (i.e., for db-MFCC), the density-based correction is given by

$$\begin{aligned}
\Delta E_{\text{db-eb}}^{(1)} & \left[ \{\rho_{i_1}^f\}_{i_1=1,\dots,N}, \{\rho_{[k_1,k_1+1]}^c\}_{k_1=1,\dots,N-1} \right] \\
& = E_{\text{NN}}^{\text{tot}} - \sum_{i_1=1}^N \sum_{j_1=i_1+1}^N E_{\text{NN}}^{f,(i_1)} + \sum_{k_1=1}^N \sum_{l_1=1}^{N-1} E_{\text{NN}}^{c,(k_1)} \\
& + \sum_{i_1=1}^N \sum_{\substack{j_1=1 \\ j_1 \neq i_1}}^N \int \rho_{i_1}^f(\mathbf{r}) v_{\text{nuc}}^{f,(j_1)}(\mathbf{r}) d^3r - \sum_{i_1=1}^N \sum_{k_1=1}^{N-1} \int \rho_{i_1}^f(\mathbf{r}) v_{\text{nuc}}^{c,[k_1,k_1+1]}(\mathbf{r}) d^3r \\
& + \sum_{k_1=1}^{N-1} \sum_{\substack{l_1=1 \\ l_1 \neq k_1}}^{N-1} \int \rho_{[k_1,k_1+1]}^c(\mathbf{r}) v_{\text{nuc}}^{c,([l_1,l_1+1])}(\mathbf{r}) d^3r \\
& + \sum_{i_1=1}^N \sum_{j_1=i_1+1}^N \iint \frac{\rho_{i_1}^f(\mathbf{r}) \rho_{j_1}^f(\mathbf{r}')}{|\mathbf{r} - \mathbf{r}'|} d^3r d^3r' - \sum_{i_1=1}^N \sum_{k_1=1}^{N-1} \iint \frac{\rho_{i_1}^f(\mathbf{r}) \rho_{[k_1,k_1+1]}^c(\mathbf{r}')}{|\mathbf{r} - \mathbf{r}'|} d^3r d^3r' \\
& + \sum_{k_1=1}^{N-1} \sum_{l_1=k_1+1}^{N-1} \iint \frac{\rho_{[k_1,k_1+1]}^c(\mathbf{r}) \rho_{[l_1,l_1+1]}^c(\mathbf{r}')}{|\mathbf{r} - \mathbf{r}'|} d^3r d^3r' \\
& + E_{\text{xc}}^{\text{nadd}} \left[ \{\rho_{i_1}^f\}_{i_1=1,\dots,N}, \{\rho_{[k_1,k_1+1]}^c\}_{k_1=1,\dots,N-1} \right] \\
& + T_s^{\text{nadd}} \left[ \{\rho_{i_1}^f\}_{i_1=1,\dots,N}, \{\rho_{[k_1,k_1+1]}^c\}_{k_1=1,\dots,N-1} \right]. \tag{S11}
\end{aligned}$$

The nonadditive exchange–correlation and kinetic energy functionals are now given by

$$\begin{aligned}
X^{\text{nadd}} & \left[ \{\rho_{i_1}^f\}_{i_1=1,\dots,N}, \{\rho_{[k_1,k_1+1]}^c\}_{k_1=1,\dots,N-1} \right] \\
& = X[\rho_{\text{tot}}] - \sum_{i_1=1}^N X[\rho_{i_1}^f] + \sum_{k_1=1}^{N-1} X[\rho_{[k_1,k_1+1]}^c] \tag{S12}
\end{aligned}$$

### S1.3 db-MFCC-MBE(2)

At second order, the density-based correction is given by

$$\begin{aligned}
\Delta E_{\text{db-eb}}^{(2)} & \left[ \{\rho_{i_1}^f\}, \{\rho_{[k_1, k_1+1]}^c\}, \{\rho_{i_1 i_2}^{\text{ff}}\}, \{\rho_{i_1 [k_1, k_1+1]}^{\text{fc}}\}, \{\rho_{[k_1, k_1+1], [k_2, k_2+1]}^{\text{cc}}\} \right] \\
& = \left( V_{\text{nuc}}[\rho_{\text{tot}}^{(2)}] - V_{\text{nuc}}^{(2)} \right) + \left( J[\rho_{\text{tot}}^{(2)}] - J^{(2)} \right) \\
& \quad + E_{\text{xc}}^{\text{nadd}, (2)} \left[ \{\rho_{i_1}^f\}, \{\rho_{[k_1, k_1+1]}^c\}, \{\rho_{i_1 i_2}^{\text{ff}}\}, \{\rho_{i_1 [k_1, k_1+1]}^{\text{fc}}\}, \{\rho_{[k_1, k_1+1], [k_2, k_2+1]}^{\text{cc}}\} \right] \\
& \quad + T_{\text{s}}^{\text{nadd}, (2)} \left[ \{\rho_{i_1}^f\}, \{\rho_{[k_1, k_1+1]}^c\}, \{\rho_{i_1 i_2}^{\text{ff}}\}, \{\rho_{i_1 [k_1, k_1+1]}^{\text{fc}}\}, \{\rho_{[k_1, k_1+1], [k_2, k_2+1]}^{\text{cc}}\} \right].
\end{aligned} \tag{S13}$$

All terms in this expression can be evaluated in full analogy to those discussed above for the case of the db-MBE, with the difference that in the many-body expansions of the individual energy terms, the more general expansions including fragments and cap molecules as well as fragment–fragment, fragment–cap, and cap–cap interactions need to be accounted for.

A general implementation that covers both the conventional db-MBE case and the extension to the MFCC expansion can be achieved by assigning a prefactor of +1 to all fragments and a prefactor of −1 to all cap molecules, and carrying these prefactors through all the expressions.

## S2 Plot of total absolute errors for protein test set

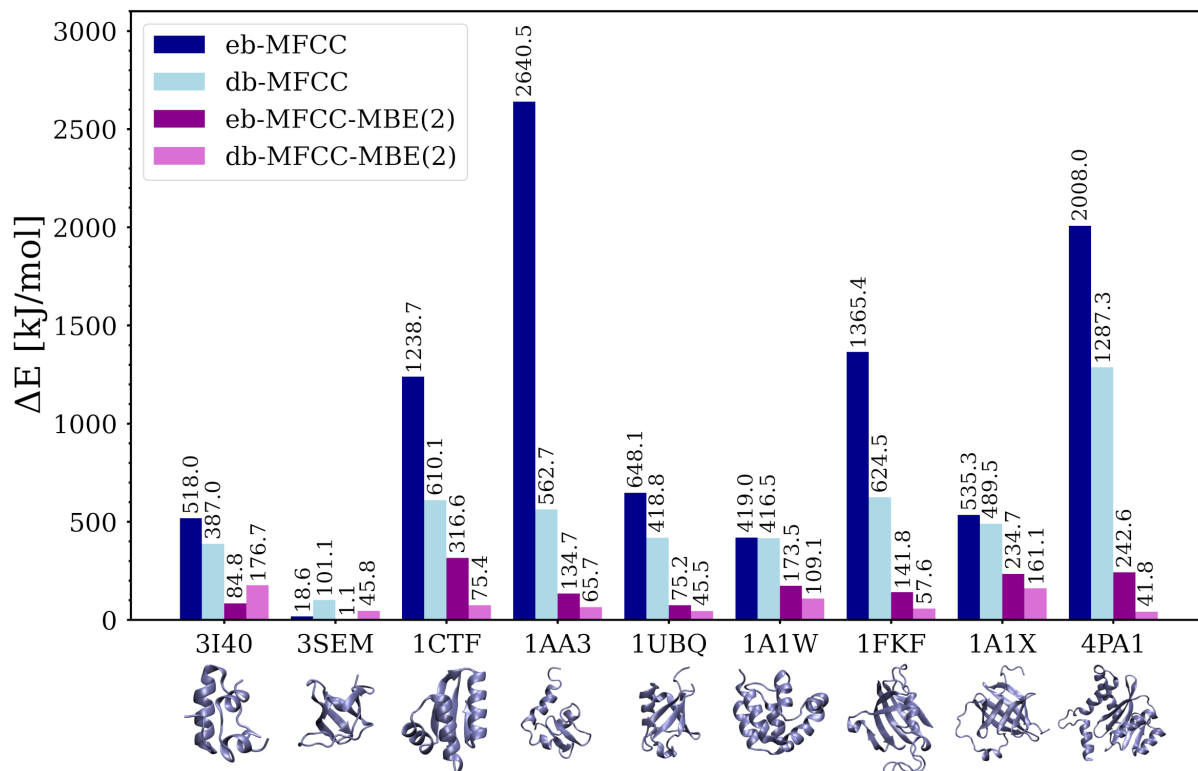

Figure S1: Comparison of the total absolute errors in the total energy (DFT/BP86/DZP) with the energy-based and the density-based MFCC and MFCC-MBE(2) schemes for our test set of small proteins. As reference, single-point calculations for the full proteins have been performed.

## References

- [1] Ch. R. Jacob and J. Neugebauer, *Subsystem density-functional theory*, WIREs Comput. Mol. Sci. **4**, 325 (2014).
